# Supplementary material for: Inhibition of Death-associated Protein Kinase 1 protects against Epileptic Seizures in mice
Source: PubMed Central journal article supplement (PMC8241737; doi:10.7150/ijbs.59922), 2021-06-11
Supplement: ijbsv17p2356s1.pdf [file ijbsv17p2356s1.pdf]

Supplementary Materials

Gan et al.

**Inhibition of Death-associated Protein Kinase 1 Protects against Epileptic Seizures in Mice**

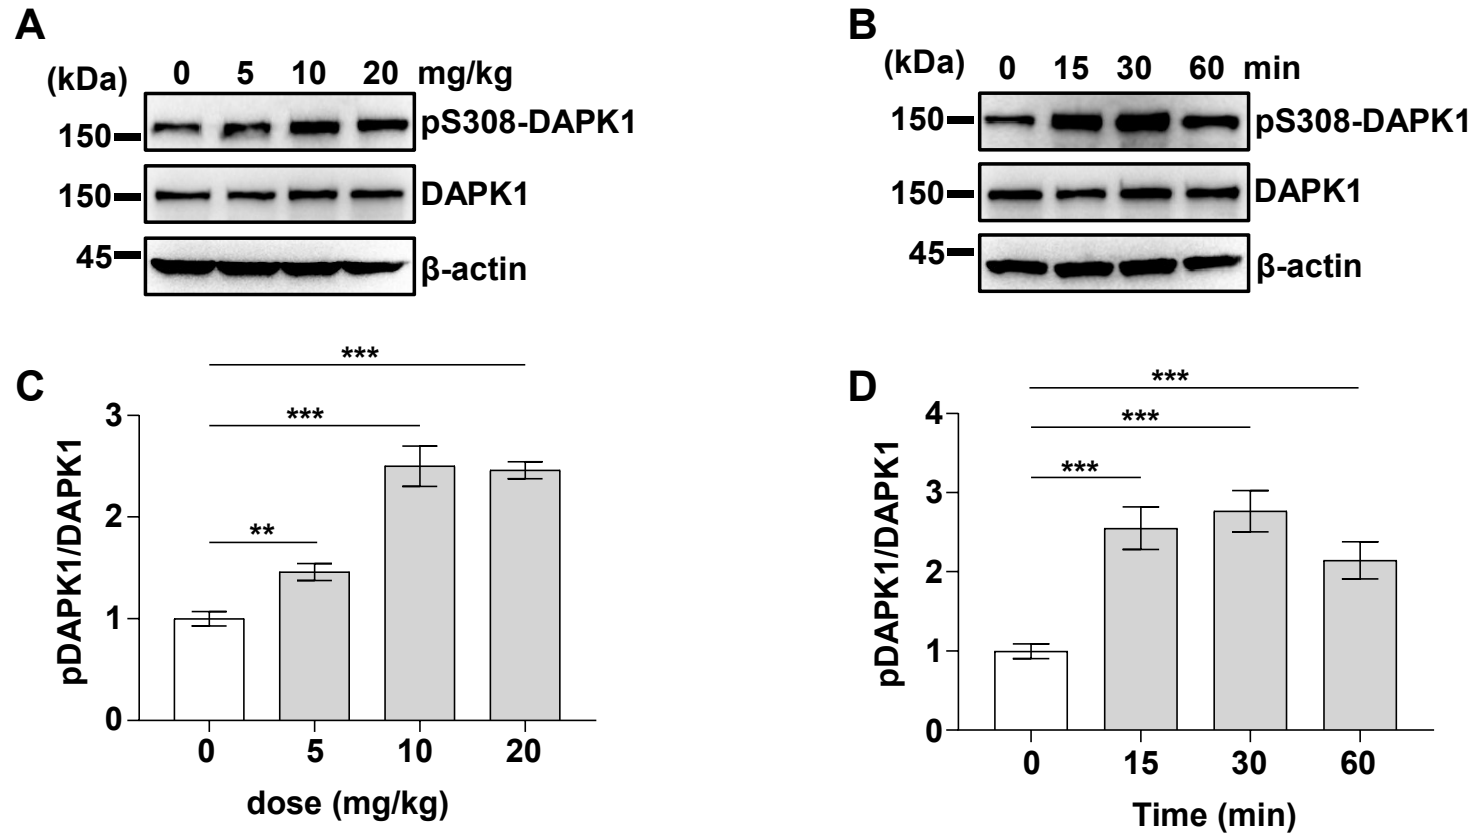

**Fig. S1** DAPK1 inhibitor (C6) suppresses DAPK1 activity in mouse brain.

**A** Mice (C57BL/6, male, P56-P80,  $n = 5$ /group) were administered different dose of C6, and brain tissues were harvested 30 min after C6 injection. **B** Mice (C57BL/6, male, P56-P80,  $n = 5$ /group) were administered C6 (10 mg/kg), and brain tissues were harvested at different time point after C6 injection. Hippocampal lysates were subjected to immunoblotting analysis with anti-pSer308-DAPK1, anti-DAPK1, and anti- $\beta$ -actin antibodies. **C-D** Statistical significance was determined by one-way ANOVA with Tukey's multiple comparisons tests (\*\* $P < 0.01$ , \*\*\* $P < 0.001$ ). All data shown represent the means  $\pm$  standard errors of three independent experiments.

**Supplementary Table 1 Primary antibodies used in this study.**

| <b>Antibody</b>             | <b>Dilution</b> | <b>Source</b>             | <b>Identifier</b> |
|-----------------------------|-----------------|---------------------------|-------------------|
| Mouse anti-DAPK1            | 1:1000 (WB)     | MilliporeSigma            | D2178             |
| Rabbit anti-DAPK1           | 1:50 (IHC)      | MilliporeSigma            | SAB4500620        |
| Mouse anti-pS308 DAPK1      | 1:1000 (WB)     | Abmart                    |                   |
| Mouse anti-pS308 DAPK1      | 1:1000 (IHC)    | MilliporeSigma            | D4941             |
| Mouse anti-MLC              | 1:1000 (WB)     | Abcam                     | ab233152          |
| Mouse anti-pMLC (Ser19)     | 1:1000 (WB)     | Cell Signaling Technology | 3675              |
| Rabbit anti-NR2B            | 1:1000 (WB)     | Abcam                     | 65783             |
| Rabbit anti-pNR2B (Ser1303) | 1:1000 (WB)     | MilliporeSigma            | 07-398            |
| Mouse anti- $\beta$ -actin  | 1:20000 (WB)    | MilliporeSigma            | A5441             |

WB, Western blotting; IHC, Immunohistochemistry
